# Supplementary material for: Quercetin Induces Anticancer Activity by Upregulating Pro-NAG-1/GDF15 in Differentiated Thyroid Cancer Cells
Source: MDPI journal article supplement (doi:10.3390/cancers13123022), 2021-06-16
Supplement: s1 [file s1]

Supplementary Materials

# Quercetin Induces Anticancer Activity by Upregulating Pro-NAG-1/GDF15 in Differentiated Thyroid Cancer Cells

Yukyung Hong, Jaehak Lee, Hyunjin Moon, Chang H. Ryu, Jungirl Seok, Yuh-Seog Jung, Junsun Ryu\* and Seung J. Baek\*

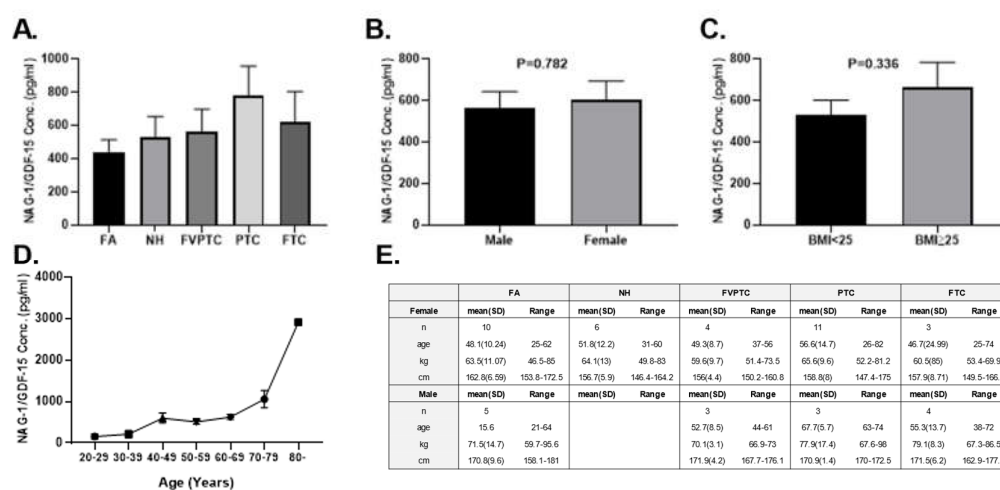

**Figure S1.** NAG-1/GDF-15 concentration was increased by age. (A) ELISA assay was performed using plasma from thyroid cancer patients to measure concentration of NAG-1/GDF15. NAG-1/GDF15 level is not significantly different between thyroid cancer types. (B) There was no NAG-1/GDF-15 gender difference between female and male. (C) NAG-1/GDF15 concentrations did not differ between group with BMI above 25 and group with BMI below 25. (D) NAG-1/GDF15 level is increased with age as consistent with previous reports. (E) Patient information used in NAG-1 ELISA. FA, follicular adenoma; NH, nodular hyperplasia; FVPTC, follicular variant papillary thyroid carcinoma; PTC, papillary thyroid cancer; FTC, follicular thyroid cancer.

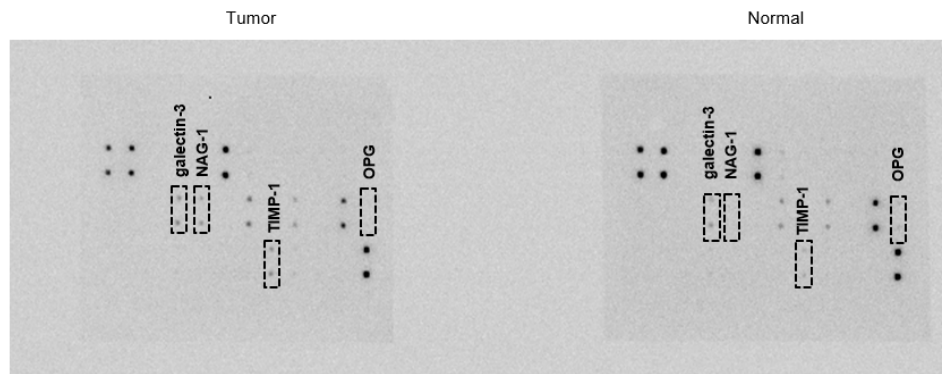

**Figure S2.** Uncropped Figure 1A.

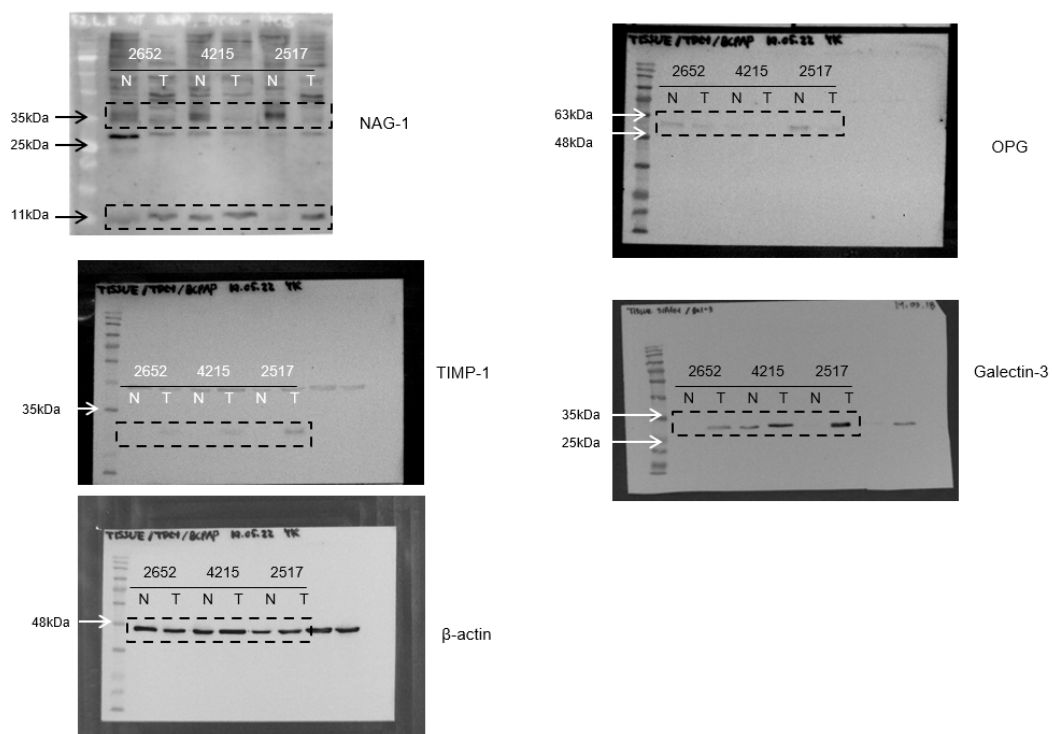

**Figure S3.** Uncropped Figure 1B.

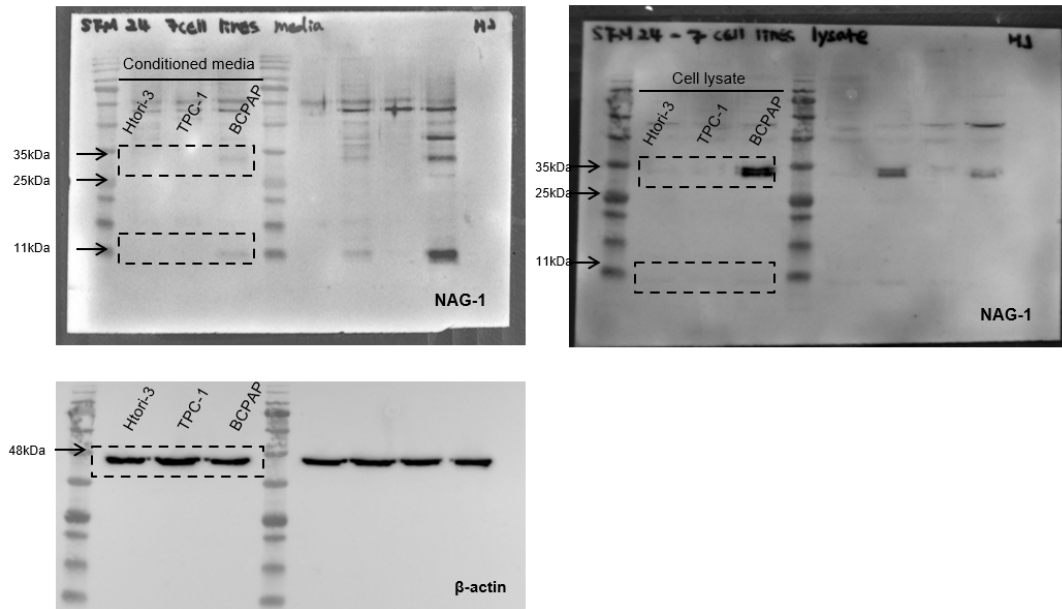

Figure S4. Uncropped Figure 2B.

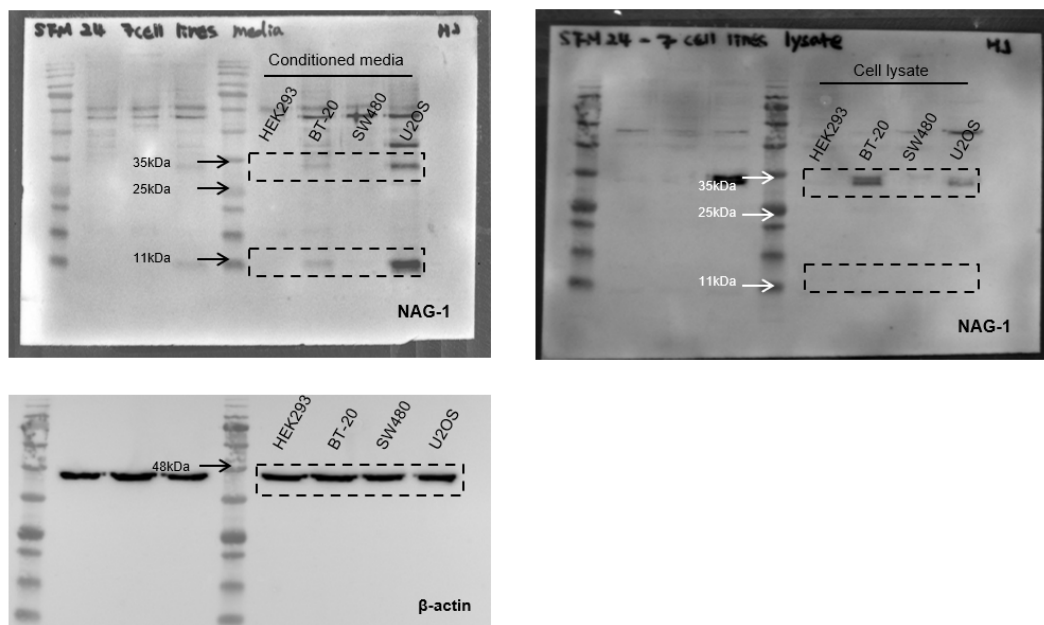

Figure S5. Uncropped Figure 2C.

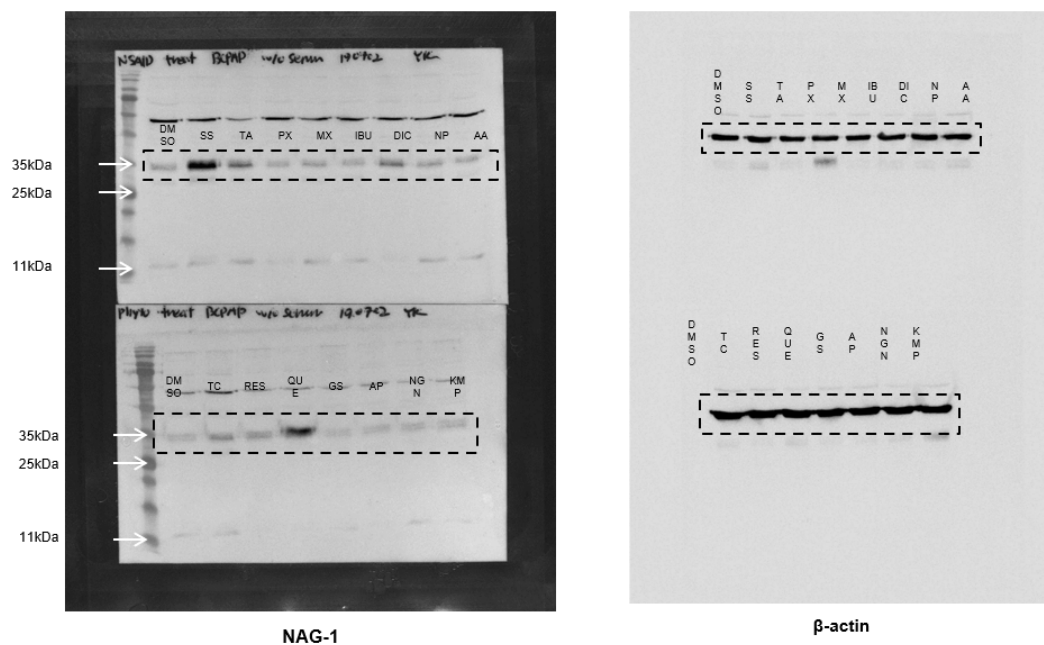

Figure S6. Uncropped Figure 3A, 3B.

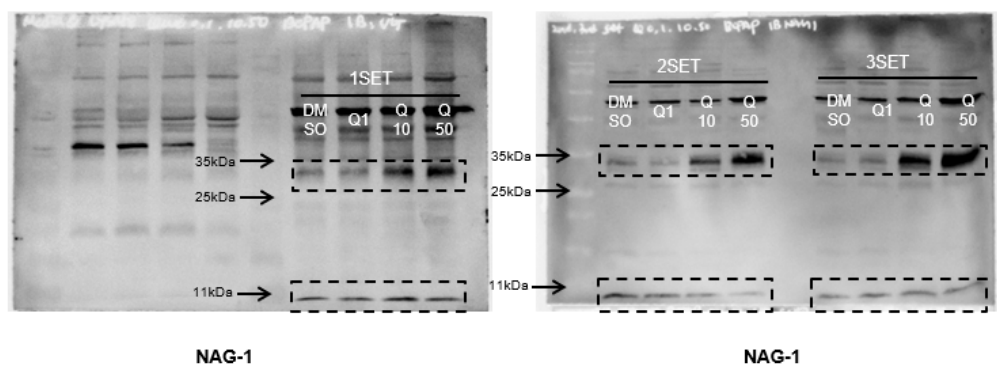

Figure S7. Uncropped Figure 3C.
